# Supplementary material
Source: publisher figshare collection journal article supplement (https://sage.figshare.com/ndownloader/files/15111671)
Supplement: Supplementary file 1 [file 15111671]

**Appendix D:**  
Face-work strategies

|                                                        | Strategy               | Description                                                                                                            | Example quote (case no. from which it was extracted).                                                                                                                                                                  | No. of cases evident |
|--------------------------------------------------------|------------------------|------------------------------------------------------------------------------------------------------------------------|------------------------------------------------------------------------------------------------------------------------------------------------------------------------------------------------------------------------|----------------------|
| <b>Self - Enacted</b><br>by the video-recorded teacher | Dominating the floor   | Dominating the floor, presenting one's professional philosophy, values, dilemmas etc.                                  | In response to an evaluation that the video-recorded teacher was too dominant, she speaks uninterruptedly for four and a half minutes about her educational ideology and her empowering relationship with students (8) | 7                    |
|                                                        | Pre-emption            | Mitigating anticipated critique, by pointing to students characteristics, organizational constrains, the setting, etc. | "Take into account that it's a social group and kids are allowed also to unwind and sit on the floor" (5)                                                                                                              | 8                    |
|                                                        | Self-critique          | Criticizing one's own practice, raising questions or doubts it.                                                        | "So this was the dilemma, like, the unprofessionalism. I didn't know the method deeply" (12)                                                                                                                           | 8                    |
|                                                        | Self-provided solution | Offering a preferred course of action regarding a problem of practice                                                  | "I should have projected their work on the screen" (2)                                                                                                                                                                 | 7                    |
|                                                        | Praising               | Praising, complimenting, appreciating the teacher, her practice and her willingness to share it.                       | "You're amazing...a role model...inspiring" (9)<br>"the lesson was wonderful" (10)                                                                                                                                     | 14                   |

|                                                                                         |                                        |                                                                                                                                  |                                                                                                                             |    |
|-----------------------------------------------------------------------------------------|----------------------------------------|----------------------------------------------------------------------------------------------------------------------------------|-----------------------------------------------------------------------------------------------------------------------------|----|
| <b>Other -</b><br>Enacted<br>by others                                                  | Compliment to<br>compensate            | Complimenting or highlighting positive aspects of practice<br>to balance a face threat posed or anticipated.                     | "It's clear that you really love your class, on the other<br>hand you're not relaxed...insecure" (4)                        | 10 |
|                                                                                         | Distancing into<br>abstraction         | Talking about abstract teaching and learning or other<br>teachers' practice; framing problems of practice as shared<br>"issues". | "Should <u>we</u> correct their reading?" (1)                                                                               | 11 |
|                                                                                         | Enforcing the<br>protocol              | Using the protocol's procedures or norms to delegitimize<br>threat.                                                              | "Only description now. no judgment!" (8)                                                                                    | 8  |
|                                                                                         | Retreating                             | Retreating mitigating or apologizing after posing a threat.                                                                      | What about the other kids?... How will I phrase it so it<br>doesn't sound... how will I ask this without, well?" (11)       | 7  |
|                                                                                         | Undermining the<br>critique's validity | Undermining the validity of critique, by for example,<br>presenting it as a question or pointing to lack of experience.          | "Maybe because I'm teaching little ones, sweet heart, I<br>was missing some illustrations" (11)                             | 5  |
| <b>Both -</b><br>Enacted<br>by either<br>the video-<br>recorded<br>teacher or<br>others | Offering reasons<br>to justify         | Explaining, justifying, arguing for a practice.                                                                                  | "I do it [correcting student's reading] so students don't<br>correct [each other]. Sometimes students correct<br>wrong" (1) | 14 |
|                                                                                         | Shifting the face<br>threat            | Admitting or implying that others share the discussed<br>problem, doubting counter practice, normalization.                      | "I have the same issue and I know it's bad for some<br>students" (13) "we all make mistakes when we talk" (3)               | 11 |
|                                                                                         | Professional<br>positioning            | Stressing teacher's professionalism, success, investment,<br>care, thoughtfulness, unique field of expertise etc.                | "This is something you should learn from me" (7)                                                                            | 15 |

|                                                |                                                                                                                  |                                                                                          |    |
|------------------------------------------------|------------------------------------------------------------------------------------------------------------------|------------------------------------------------------------------------------------------|----|
| Focusing on appearance or other technicalities | Addressing teacher or classroom appearance or other technical aspects.                                           | "I'm fat" (14)                                                                           | 3  |
| Blaming the video                              | Arguing for misinterpretation due to missing context or to the interference of the camera.                       | "I walked among the students, to my regret, again, you can't see it [in the video]" (15) | 6  |
| Ignoring face threat                           | Ignoring face threat.                                                                                            | "It's ok. Nothing happened." (15)                                                        | 3  |
| Disagreeing                                    | Disagreeing with the description, interpretation or analysis the threat is based on.                             | "But she [the student] did speak and shared" (6)                                         | 11 |
| Recruiting authority                           | Arguing for the practice relying on authority such as the coach, research or a professional development program. | "I learned it in my professional development" (5)                                        | 11 |
| Excusing malpractice                           | Pointing to circumstances beyond the teacher control which explain malpractice or problems of practice.          | "we know this class's history" (4)                                                       | 7  |
| Using humor                                    | Using (self)humor, making fun of oneself, the situation or the threatening remark.                               | "I said I'm a genius and finally I contributed my share to mathematics" (12)             | 7  |
